# Supplementary material
Source: Research Square preprint supplement (doi:10.21203/rs.3.rs-9727823/v1)
Supplement: Supplementary file 1 [file 74c701d9d23cd414ae9f22c5.docx]

**Graphical Abstract Text (44/50 Words)**

In a large target trial emulation using TriNetX data, glucagon-like peptide-1 receptor agonist initiation was associated with a lower risk of incident colorectal polyps or adenomas compared with sodium–glucose cotransporter-2 inhibitors after rigorous propensity score matching and a ≥180-day latency period following colonoscopy.
